# Supplementary material
Source: MDPI journal article supplement (https://www.mdpi.com/2079-9284/9/1/12)
Supplement: s1 [file s1]

## Article

# *In vitro* Cell Culture of *Rhus coriaria* L.: A Standardized Phytocomplex Rich of Gallic Acid Derivatives with Antioxidant and Skin Repair Activity

Giovanna Pressi <sup>1,\*</sup>, Oriana Bertaiola <sup>1</sup>, Chiara Guarnerio <sup>1</sup>, Elisa Barbieri <sup>1</sup>, Giovanna Rigillo <sup>2</sup>, Paolo Governa <sup>3</sup>, Marco Biagi <sup>4</sup>, Flavia Guzzo <sup>5</sup> and Alessandra Semenzato <sup>6</sup>

Supplementary material

**Table S1.** *Rhus coriaria* putatively identified metabolites by means of UPLC-ESI-MS. rt (retention time), detected m/z (mass-to-charge ratio), calculated m/z, mass error (in PPM), elemental formula are reported.

| rt    | m/z(-) Detected | m/z(-) Calculated | Mass Error | Elemental Formula | Putative Identification            |
|-------|-----------------|-------------------|------------|-------------------|------------------------------------|
| 1.605 | 387.114         | 387.114           | 0.560      | C12H22O11         | Sucrose, formic adduct             |
| 2.439 | 331.067         | 331.066           | −2.477     | C13H16O10         | Gallic acid hexose                 |
| 2.940 | 331.067         | 331.066           | −2.209     | C13H16O10         | Gallic acid hexose                 |
| 3.451 | 331.066         | 331.066           | −1.229     | C13H16O10         | Gallic acid hexose                 |
| 3.606 | 329.087         | 329.087           | −0.259     | C14H18O9          | Vanillic acid glucoside            |
| 4.117 | 371.097         | 371.098           | 1.000      | C15H18O8          | Coumaric and hexose, formic adduct |
| 4.306 | 341.087         | 341.087           | 0.024      | C15H18O9          | Caffeic acid hexose                |
| 4.492 | 355.103         | 355.103           | 0.611      | C16H20O9          | Ferulic acid hexoside              |
| 4.587 | 577.135         | 577.135           | −0.192     | C30H26O12         | Procyanidin P2-type                |
| 4.702 | 865.197         | 865.197           | −0.333     | C45H38O18         | Procyanidin P3-type                |
| 4.804 | 289.072         | 289.072           | −1.890     | C15H14O6          | Catechin                           |
| 4.930 | 325.092         | 325.092           | −0.492     | C15H18O8          | Coumaric acid hexose               |
| 5.179 | 325.092         | 325.092           | 0.140      | C15H18O8          | Coumaric acid hexose               |
| 5.253 | 355.102         | 355.103           | 1.169      | C16H20O9          | Ferulic acid hexoside              |
| 5.347 | 635.088         | 635.088           | 0.038      | C27H24O18         | Trigalloyl hexose                  |
| 5.879 | 447.092         | 447.092           | −0.615     | C21H20O11         | Tetrahydroxyflavone-O- hexoside    |
| 6.265 | 447.092         | 447.092           | −0.016     | C21H20O11         | Tetrahydroxyflavone-O-hexoside     |
| 6.640 | 449.108         | 449.108           | 0.305      | C21H22O11         | Tetrahydroxyflavone-O-hexoside     |
| 6.723 | 469.048         | 469.051           | 7.360      | C41H32O26         | Pentagalloyl hexose                |
| 7.036 | 545.054         | 545.057           | 5.758      | C48H36O30         | Hexagalloyl hexose, M/2-H+ adduct  |
| 7.452 | 621.059         | 621.062           | 5.408      | C55H40O34         | Heptagalloyl hexose, M/2-H+ adduct |
| 7.712 | 697.064         | 697.068           | 5.243      | C62H44O38         | Octagalloyl hexose, M/2-H+ adduct  |

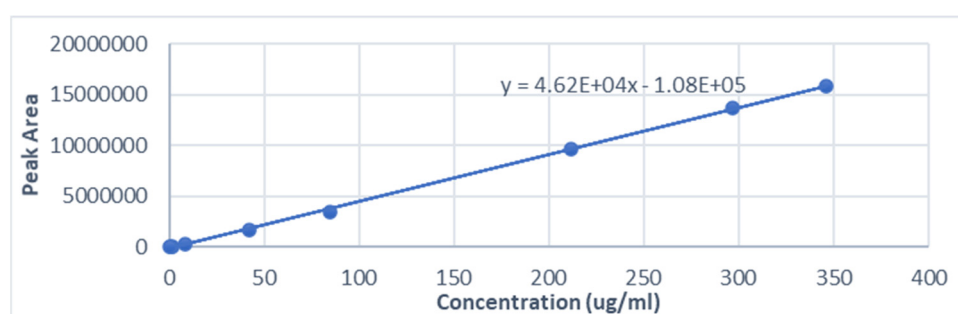

**Figure S1.** Calibration curve of gallic acid; values are mean of two independent measures. The linear regression equation is reported ( $R^2 = 0.9999$ ).

**Table S2.** Results of linearity regression, correlation coefficient, LOD and LOQ for gallic acid standard.

| Regression equation                      | $R^2$  | Residual STD ( $\sigma$ ) | Calibration curve<br>slop (S) | LOD ( $\mu\text{g/mL}$ ) | LOQ ( $\mu\text{g/mL}$ ) |
|------------------------------------------|--------|---------------------------|-------------------------------|--------------------------|--------------------------|
| $y = 4.61\text{E}+04x - 2.21\text{E}+05$ | 0.9999 | 2.24E+04                  | 4.60E+04                      | 1.5                      | 4.9                      |
| $y = 4.59\text{E}+04x - 1.43\text{E}+05$ | 0.9999 |                           |                               |                          |                          |
| $y = 4.59\text{E}+04x - 8.53\text{E}+05$ | 0.9998 |                           |                               |                          |                          |
| $y = 4.60\text{E}+04x - 1.50\text{E}+05$ | 0.9998 |                           |                               |                          |                          |

**Table S3.** Intra-day variability of gallic acid standard.

| Concentration ( $\mu\text{g/mL}$ ) | Repeated measurements (n=3) |
|------------------------------------|-----------------------------|
|                                    | RDS (%)                     |
| 136.0                              | 0.71                        |
| 228.0                              | 0.59                        |
| 319.0                              | 0.11                        |

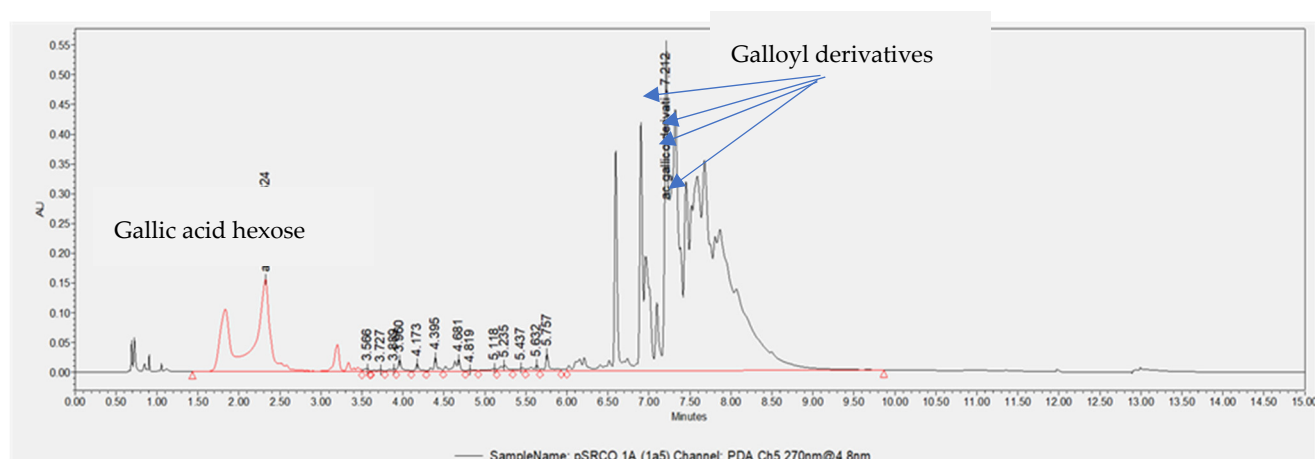

**Figure S2.** Chromatographic profile of RC-P extract at the wavelength of 270 nm, using the UPLC-DAD analysis, to estimate the content of gallic acid derivatives. Galloyl derivatives are identified by their characteristic spectrum with  $\lambda_{\text{max}}$  at 270 nm.
